# Supplementary material for: Effects of Different Light Spectra on Final Biomass Production and Nutritional Quality of Two Microgreens
Source: MDPI journal article supplement (doi:10.3390/plants10081584), 2021-07-31
Supplement: s1 [file s1]

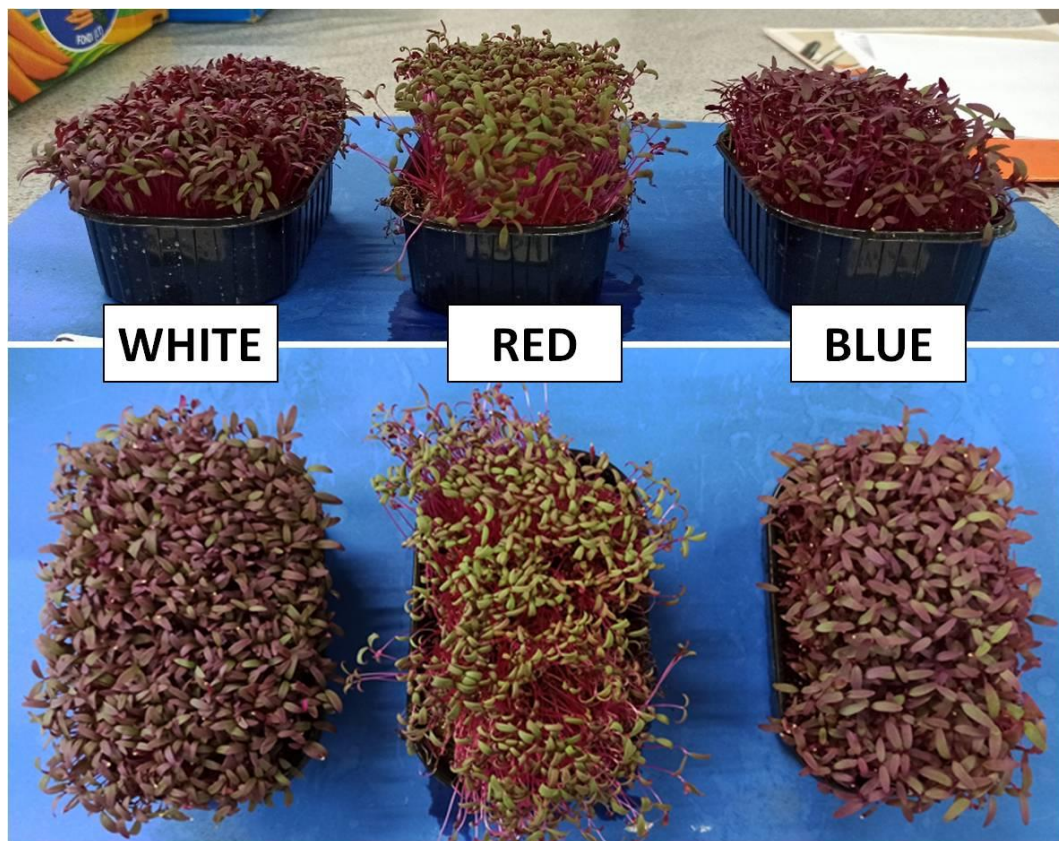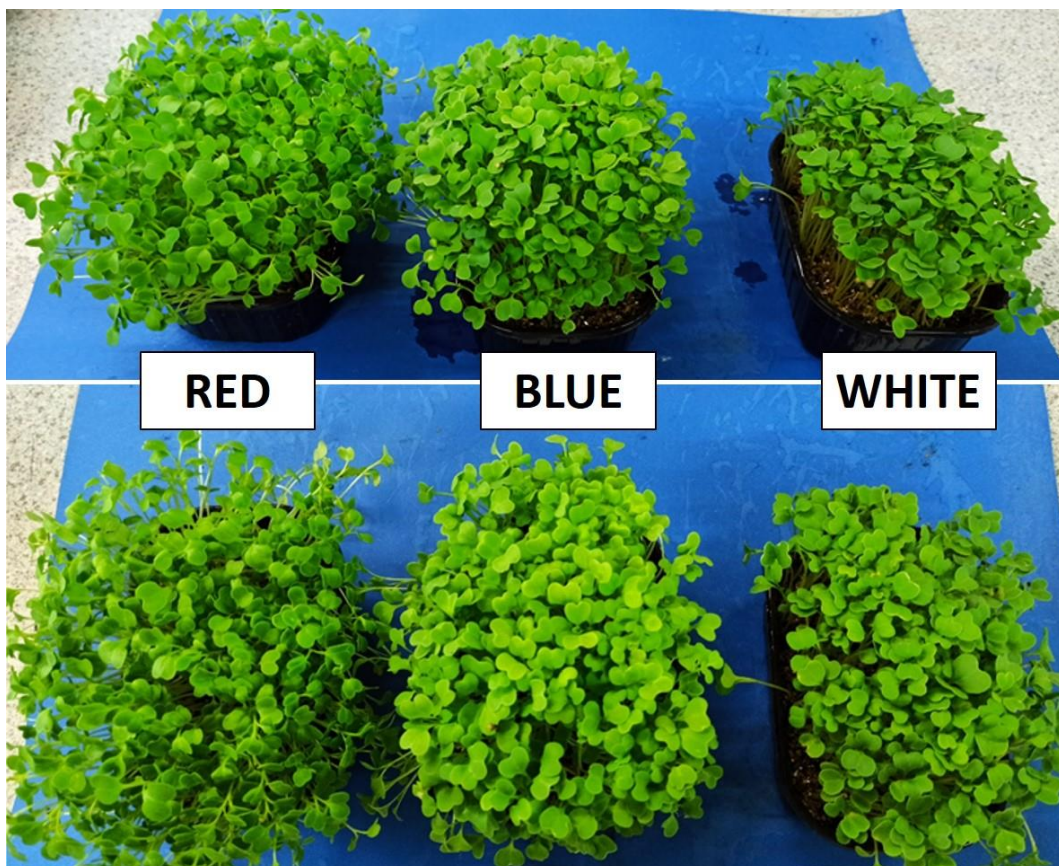

**Figure S1.** Amaranthus microgreens and Turnip greens microgreens 10 days from sowing at different LED light treatments.

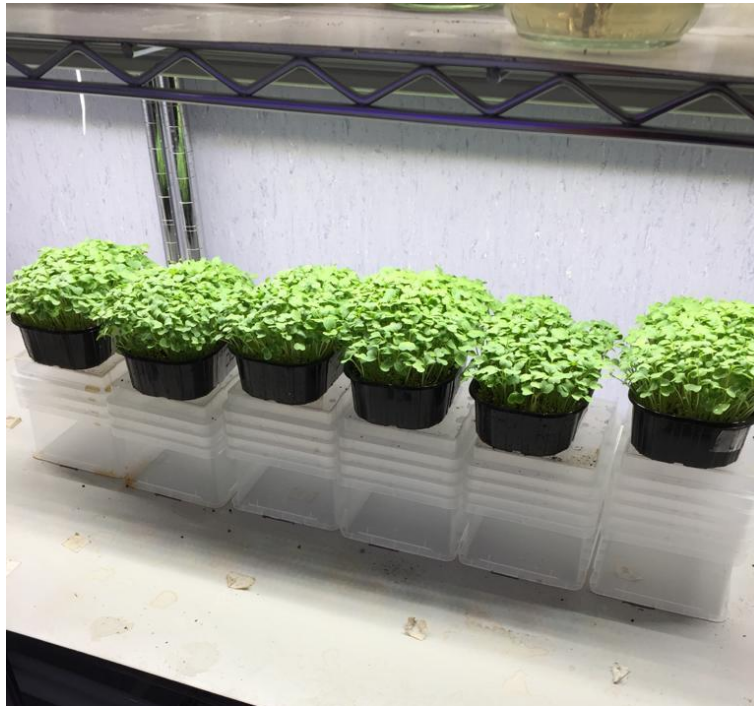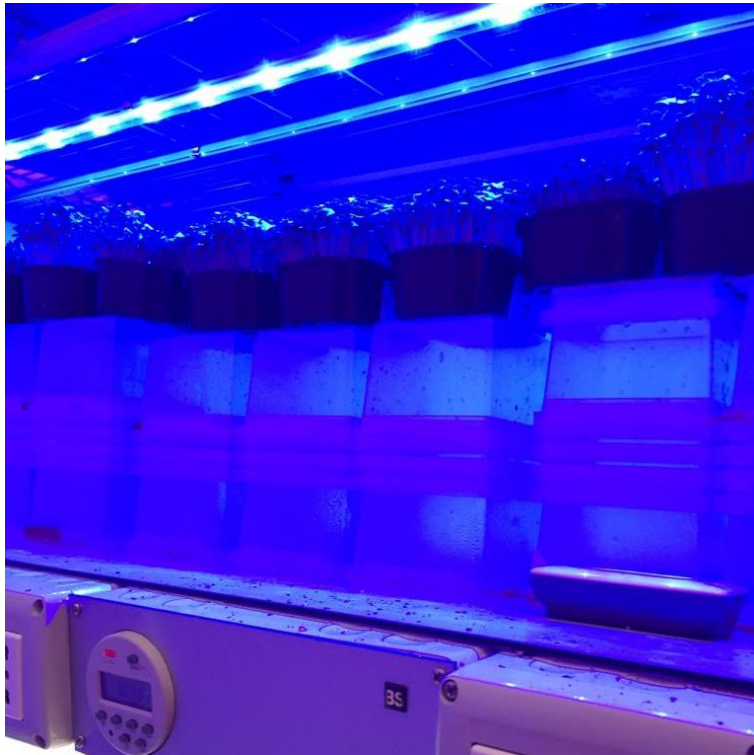

**Figure S2.** Microgreens in growth chamber at different LED light treatments (White and Blue).
